# Supplementary material
Source: PubMed Central journal article supplement (PMC6838714)
Supplement: DS1_JVDI_10.1177_1040638719832071.pdf [file DS1_JVDI_10.1177_1040638719832071.pdf]

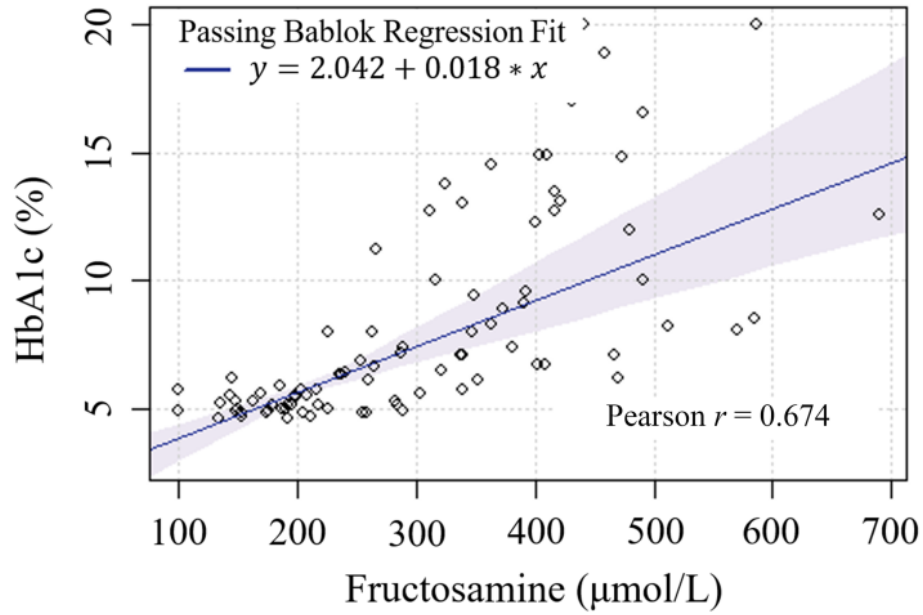

**Supplementary Figure 3.** Passing–Bablok regression analysis of fructosamine and HbA1c levels in 90 dogs. Scatter diagram was plotted with regression line of  $y = 2.042 + 0.018x$ . Shaded area indicated 95% confidence interval. Pearson correlation coefficient was 0.674 ( $p < 0.001$ ).
